# Supplementary material for: Dinosaur track assemblages from mid-Cretaceous of Fujian Province, southeastern China: ichnotaxonomic review and faunal comparison
Source: PeerJ. 2025 Jun 24;13:e19597. doi: 10.7717/peerj.19597 (PMC12204092; doi:10.7717/peerj.19597)
Supplement: Supplemental Information 1 [file peerj-13-19597-s001.xlsx]

## Sheet: Abrriviations
L	Track length
W	Track width
L/W	L/W ratio
M	Mesaxony (=AT, anterior triangle length/width ratio)
M +claw	Mesaxony with claw marks included (when the boundary of claw can be distinguished)
II-III	Divarication angle between digit II and III
III-IV	Divarication angle between digit III and IV
II-IV	Divarication angle between digit II and IV
R	Rotation angle (to the trackway orientation)
PL	Pace length
SL	Stride length
PA	Pace angulation
A	Area of the track
H	Heteropody (=the ratio of the manus/pes track area)
WAP	=Gauge width
WAP/P’L	=Relative gauge width

## Sheet: S_Brontopodus-like
LXIU
	L	W	R	L/W	PL	SL	PA	A	H	WAP	WAP/P’ML	TL*
LXIU-S1-LP1	45.8	29.2	16	1.56849	88.3	173.2	134.876	1054.2	6.57929	35.8385	0.782499	56,3
S1-RP1	47.7	29.6	-	1.61149	99.2	—	—	1117	7.87729	—	—	60
S1-LP2	43	27.8	-	1.54676	—	—	—	1000.3	5.32074	—	—	54.5
S1-RP3	37.4	30	22	1.24667	91.9	153	120.357	955.5	3.65952	43.7443	1.16963	52
S1-LP4	46.1	29.3	31	1.57338	84.4	158.1	121.47	1090.8	13.2862	44.0295	0.955086	46.2
S1-RP4	36	28.4	21	1.26761	96.7	167.1	130.3	868.9	3.91573	38.5743	1.07151	46.4
S1-LP5	44.7	31.1	33	1.4373	87.4	142	121.387	1062.7	5.21187	39.5648	—	56.7
S1-RP5	35.2	24.9	35	1.41365	75.3	149.4	138.741	795	2.29173	28.0195	—	52.2
S1-LP6	39.1	31.6	-4	1.23734	84.3	166.4	142.133	961.8	12.2056	28.485	0.728518	44.6
S1-RP6	42.3	27.7	0	1.52708	91.6	154.6	127.49	970.1	2.4697	37.9387	0.896895	57.8
S1-LP7	38.5	36.3	-4	1.06061	80.7	166.8	129.101	1120.4	4.79829	38.9345	1.01129	49.4
S1-RP7	39.5	34.5	12	1.14493	103.7	183.6	137.727	1118.8	3.78741	35.3714	0.895478	54.5
S1-LP8	41.8	40.4	21	1.03465	93.1	152	127.059	1284.9	2.31973	37.392	0.894546	63
S1-RP8	48.3	36	38	1.34167	76.5	146.3	135.422	1022.3	2.30403	29.9481	0.620044	58.3
S1-LP9	33.6	31.2	16	1.07692	81.6	132.5	102.254	869.7	3.07641	53.2609	1.58515	48.3
S1-RP9	39	35.2	45	1.10795	88.5	165.2	129.543	1134.9	1.6285	38.874	0.99677	56.2
S1-LP10	34	38.3	21	0.887728	94.1	160.5	110.827	901.6	2.93681	55.2369	1.62461	50.2
S1-RP10	37.4	35.6	37	1.05056	100.8	169.6	132.851	1099.5	1.59741	36.6444	0.979798	60.1
S1-LP11	41.6	31	29	1.34194	84.1	156.4	107.393	1134.2	2.79566	55.9834	1.34575	60.4
S1-RP11	42.5	38.7	31	1.09819	109.1	184.5	139.487	1075.4	2.45189	33.5736	0.789968	59.2
S1-LP12	36.4	34.7	38	1.04899	87.4	178.2	138.127	1208.1	1.63633	33.8177	0.929057	63.31
S1-RP12	34.5	39.6	-15	0.871212	103.3	180.4	119.72	1115.4	2.17131	52.3652	1.51783	55.1
S1-LP13	38.7	37.8	69	1.02381	105.3	—	—	1281.7	1.67499	—	—	61.3
S1-RP13	55.5	38.3	—	1.44909	—	—	—	1670.1	9.67613	—	—	63.9
Mean-P	40.775	33.2167	∣26∣	1.24867	91.2409	161.99	127.313	1079.72	4.40302	39.8798	1.04414	55.3743
S1-LM1	12.1	15.8	0	0.765823	88.9	169.2	130.195	160.23	—	39.1706
S1-RM1	18.9	11.3	—	1.67257	97.6	—	—	141.8	—	—
S1-LM2	12.2	21.5	—	0.567442	—	—	—	188	—	—
S1-RM3	15.5	15.3	—	1.01307	—	—	—	261.1	—	—
S1-LM4	8.8	15.2	—	0.578947	—	—	—	82.1	—	—
S1-RM4	17.5	14.9	9	1.1745	100.1	167.2	119.416	221.9	—	48.7603
S1-LM5	17	14.3	—	1.18881	93.5	-	—	203.9	—	—
S1-RM5	17.8	19.7	9	0.903553	—	153	—	346.9	—	—
S1-LM6	5.3	13.9	—	0.381295	—	—	—	78.8	—	—
S1-RM6	15.9	32.3	-20	0.49226	85.4	153.7	125.999	392.8	—	39.1529
S1-LM7	10.1	28.7	0	0.351916	87.1	163.9	121.5	233.5	—	45.5832
S1-RM7	16	26.9	13	0.594796	100.6	176.8	125.687	295.4	—	45.3371
S1-LM8	21.4	37	23	0.578378	98.1	148.9	113.626	553.9	—	47.9265
S1-RM8	20	29.1	0	0.687285	79.4	155.3	123.822	443.7	—	40.9457
S1-LM9	14.1	28.4	-41	0.496479	96.4	124.2	80.8132	282.7	—	72.9434
S1-RM9	22.1	40.6	64	0.544335	95.2	175.1	113.083	696.9	—	57.1682
S1-LM10	16.2	21.4	11	0.757009	114.3	166.1	92.3098	307	—	79.7593
S1-RM10	21	40.9	39	0.513447	116	168.8	102.795	688.3	—	66.746
S1-LM11	17.6	31.94	35	0.551033	99.6	148.7	81.0972	405.7	—	83.9742
S1-RM11	17.4	30.3	47	0.574257	126.9	179.2	110.187	438.6	—	59.8849
S1-LM12	27.2	34.6	46	0.786127	90.1	171.7	117.168	738.3	—	51.681
S1-RM12	20	33.1	-26	0.60423	110.7	179.5	104.22	513.7	—	69.7652
S1-LM13	23.1	40.1	82	0.57606	116.7	—	—	765.2	—	—
S1-RM13	11.6	24.7	—	0.469636	—	—	—	172.6	—	—
Mean-M	16.6167	25.9142	∣27∣	0.700969	99.8111	162.581	110.795	358.876	—	56.5866
LXIN
	L	W	R	L/W	PL	SL	PA	A	H	WAP	WAP/P’L	outer L	outer W	outer L/outer W	outer A	outer H	outer MPL	inner MPL
LXIN-S1-RP1	—	—	—	—	—	—	—	—	—	—	—	—	—	—	—	—	9.48	—
S1-LP1	—	—	—	—	—	—	—	—	—	—	—	85.09	—	—	—	—	25.92	—
S1-RP2	75.1	52.26	42.75	1.43705	109.81	187.66	106.782	3057	1.67992	69.3232	0.923078	88.45	65.33	1.3539	4602.3	1.27959	31.3	47.07
S1-LP2	64.2	55	50.73	1.16727	123.74	191.43	114.743	2854.44	1.97394	60.5722	0.943493	83.4	86.73	0.961605	5669.39	1.68095	20.23	44.59
S1-RP3	73.1	43.77	38.76	1.67009	103.18	182.37	102.889	2343.82	1.78577	71.2063	0.974095	97.39	61.63	1.58024	4734.38	1.63223	14.86	37.16
S1-LP3	66.68	59.15	40.19	1.1273	129.11	188.87	106.659	2462.22	1.68815	69.2362	1.03834	69.85	79.23	0.881611	4400.16	1.27986	9.4	35.36
S1-RP4	61.46	45.83	—	1.34104	105.72	—	—	2173.84	1.95889	—	—	77.06	58.95	1.30721	3612.54	1.5731	13.91	30.4
S1-LP4	51.25	51.33	—	0.998441	—	—	—	—	—	—	—	64.49	73.28	0.880049	—	—	—	—
S1-RP5	—	—	—	—	—	—	—	—	—	—	—	83.9	—	—	—	—	—	—
Mean-P	65.2983	51.2233	43.1075	1.2902	114.312	187.583	107.768	2578.26	1.81733	67.5845	0.96975	81.2037	70.8583	1.16077	4603.75	1.48915	17.8714	38.916
S1-RM1	40.39	47.52	97.43	0.849958	123.58	167.76	84.8102	1510.8	—	91.8355	—	66.76	72.48	0.921082	3784.29	—	—	—
S1-LM1	36.86	51.12	60.62	0.721049	125.18	172.87	93.9949	1513.23	—	80.0529	—	56.48	71.08	0.794598	3114.9	—	—	—
S1-RM2	39.84	50.16	40.43	0.794258	110.82	171.94	88.2853	1819.73	—	86.8562	—	64.52	67.05	0.962267	3596.71	—	—	—
S1-LM2	34.41	52.47	60.09	0.655803	134.82	180.52	99.4048	1446.06	—	73.6951	—	55.5	75.87	0.731514	3372.73	—	—	—
S1-RM3	37.26	43.36	47.09	0.859317	100.02	170.07	95.2755	1312.5	—	75.3458	—	70.21	61.18	1.1476	2900.56	—	—	—
S1-LM3	34.87	52.12	—	0.669033	128.66	—	—	1458.53	—	—	—	54.85	77.32	0.70939	3438.01	—	—	—
S1-RM4	32.77	44.97	—	0.728708	—	—	—	1109.73	—	—	—	49.88	57.07	0.874014	2296.44	—	—	—
Mean-M	36.6286	48.8171	61.132	0.754018	120.513	172.632	92.3542	1452.94	—	81.5571	—	59.7429	68.8643	0.877209	3214.81	—	—	—
*TL = total length (pes + manus)

## Sheet: T-theropod A
LXIN
	L	W	L/W	II-III	III-IV	II-IV	PL	SL	PA	R	M	M +claw	WAP
LXIN-T1-L1	30.32	32.04	0.946317	55.89	23.47	79.36	114.86	206.73	175.912	27	0.301428
LXIN-T1-R1	32.4	24.03	1.34831	27	33	60	92	—	—	—	0.485084
LXIN-T1-L2	31.71	25.03	1.26688	35.86	36.2	72.06	—	—	—	—	0.597021
Mean	31.4767	27.0333	1.18717	39.5833	30.89	70.4733	103.43	206.7	176	27	0.461178
LXIN-T2-L1	—	—	—	—	—	—	144	255.1	163.285	-8	—	—
LXIN-T2-R1	23	27.9	0.824373	46	48	94	113.8	240.6	169.553	-22	0.379182	0.362007
LXIN-T2-L2	23.1	31.6	0.731013	44	53	97	127.8	—	—	—	0.291803	0.287975
LXIN-T2-R2	24.9	25.3	0.98419	35	47	82	—	—	—	—	0.391667	0.391304
Mean	23.6667	28.2667	0.846525	41.6667	49.3333	91	128.533	247.85	166.419	|15|	0.354217	0.347095
LXIN-T3-L1	—	—	—	—	—	—	104.2	226.7	177	-6	—
LXIN-T3-R1	28.8	22.6	1.27434	34	28	62	122.4	—	—	—	0.410138
LXIN-T3-L2	31.1	—	—	—	—	—	—	—	—	—	—
Mean	29.95	22.6	1.27434	34	28	62	113.3	226.7	177	|6|	0.410138
LXIN-T4-R1	19.1	29.94	0.637943	45	41	86	100.9	209.82	153.014	10	0.306485	0.306947
LXIN-T4-L1	25.5	24.9	1.0241	35	42	77	114.85	204.96	151.684	-11	0.42735	0.401606
LXIN-T4-R2	29.5	32.5	0.907692	45	43	88	96.48	—	—	—	0.407051	0.403077
LXIN-T4-L2	23.1	27.3	0.846154	46	43	89	—	—	—	—	0.342308	0.336996
Mean	24.3	28.66	0.853971	42.75	42.25	85	104.077	207.39	152.349	|11|	0.370799	0.362157
LXIN-T5-R1	37	22.7	1.62996	24	28	52	82.2	180.7	127.104	16	0.657534
LXIN-T5-L1	32.8	31.2	1.05128	34	39	73	118.8	—	—	—	0.4
LXIN-T5-R2	27.4	28.2	0.971631	23	28	51	—	—	—	—	0.4
Mean	32.4	27.3667	1.21762	27	31.6667	58.6667	100.5	180.7	127.104	16	0.485845
	L	W	L/W	II-III	III-IV	II-IV	M
LXIN-TI1	37.9	36.9	1.0271	29	37	66	0.27
LXIN-TI2	26.4	21.7	1.21659	34	33	67	0.45
LXIN-TI3	36.8	23	1.6	31	25	56	0.67
LXIN-TI4	33.37	18.09	1.84467	—	21.45	—	0.684909
LXIN-TI5	30.5	36.6	0.833333	61	53	114	0.5
LXIN-TI6	19.67	19.86	0.990433	31.7	48.56	80.26	0.364048
LXIN-TI10	—	30.02	—	47.48	87.93	135.41	0.475293
LXIN-TI11	27.3	25.3	1.07905	43	34	77	0.45
LXIN-TI12	31.39	28.34	1.10762	41.45	33.18	74.63	0.494534
LXIN-TI13	36.58	36.67	0.997546	35.86	36.83	72.69	0.321516
LXIN-TI14	25.22	31.4	0.803185	47.02	38.54	85.56	0.278981
LXIN-TI15	24.08	28.39	0.848186	47.71	26.75	74.46	0.402818
LXIN-TI16	26.1	23.5	1.11064	34	35	69	0.398268
LXID
	L	W	L/W	II-III	III-IV	II-IV	PL	SL	PA	R	M	M +claw	WAP
LXID-T3-R1	26.33	27.92	0.943052	35.93	43.22	79.15	89.85	192.43	171.326	36.38	0.361727	0.337751	—
LXID-T3-L1	28.91	27.25	1.06092	30.91	34.21	65.12	103.13	—	—	—	0.215223	0.246239	7.26233
LXID-T3-R2	15.4	26.42	0.582892	43	54	97	—	—	—	—	0.201738	0.182438	—
Mean	23.5467	27.1967	0.862287	36.6133	43.81	80.4233	96.49	192.43	171.326	36.38	0.259562	0.255476	7.26233
	L	W	W'	M	L/W	L/W'	II-III	III-IV	II-IV
LXID-TI1	30.1	23.2	29.65	0.434483	1.29741	1.01518	25.09	39.47	64.48
LXIU
	L	W	L/W	M	M with claw	II-III	III-IV	II-IV
LXIU-TI7	12.94	7.17	1.80474	0.994421	0.987448	30.52	35.11	65.63
LXIII
	L	W	L/W	M	M with claw	II-III	III-IV	II-IV
LXIII-TI1	28.93	28.33	1.02118	0.309056	0.308154	49.68	24.45	74.13
LXIII-TI2	>17.5	25.12	—	0.317929	0.328424	32.66	45.93	78.59
LXIII-TI3	21.06	17.59	1.19727	0.497066	0.50199	31.77	30.56	62.33
LXIII-TI4	15.75	13.95	1.12903	0.53	0.508351	36.5	39.23	75.73

## Sheet: T-theropod B
	L	W	L/W	II-III	III-IV	II-IV	PL	SL	PA	R	M	M +claw	WAP
Morphotype B
LXIU-T2-R1	16.7	30.99	0.538884	46.51	53	99.51	110.3	197.13	136.693	-8.82	0.294678	0.270087	—
LXIU-T2-L1	—	—	—	—	—	—	101.77	195.84	131.927	—	—	—	39.0577
LXIU-T2-R2	13.2	25.87	0.510244	64.84	49.35	114.19	112.61	183.23	131.284	8.28	0.290769	0.274836	43.5378
LXIU-T2-L2	—	—	—	—	—	—	88.22	156.63	131.346	—	—	—	40.7421
LXIU-T2-R3	—	—	—	—	—	—	83.66	166.11	132.272	—	—	—	35.3749
LXIU-T2-L3	—	—	—	—	—	—	97.87	—	—	—	—	—	36.4739
LXIU-T2-R4	14.3	31.18	0.458627	75.59	32.82	108.41	—	—	—	—	0.325612	0.323926	—
Mean	14.7333	29.3467	0.5	62.3133	45.0567	107.37	99.0717	179.788	132.704	|9|	0.303686	0.289616	39.0373
LXID-T1-L1	15.12	29.9	0.505686	50.1	31.4	81.5	171.69	275.69	136.973	-22	0.281657	0.292642	—
LXID-T1-R1	13.8	30.7	0.449511	59.7	73.8	133.5	124.05	—	—	—	0.334483	0.335505	52.714
LXID-T1-L2	12.6	33.9	0.371681	88	45	133	—	273.79	—	24	0.247678	0.253687	—
LXID-T1-R2	—	—	—	—	—	—	—	—	—	—	—	—	—
LXID-T1-L3	14.5	28.2	0.514184	55	32	87	136.64	280.86	166.122	-45	0.303704	0.340426	—
LXID-T1-R3	—	—	—	—	—	—	146.29	288.16	163.81	-21	—	—	17.0709
LXID-T1-L4	—	—	—	—	—	—	144.77	—	—	—	—	—	20.492
LXID-T1-R4	—	—	—	—	—	—	—	—	—	—	—	—	—
Mean	14.005	30.675	0.460266	63.2	45.55	108.75	144.688	279.625	155.635	|28|	0.29188	0.305565	30.0923

## Sheet: T-large didactyls
LXID
	L	W	L/W	II-III	III-IV	II-IV	PL	SL	PA	R	M	M +claw	W-max	W-max w II	II	III	IV
LXID-T2-R1	56.03	15.81	3.54396	—	17	—	292.24	552.3	178.173	-2.77	—	—	32.94			51.9	52.14
LXID-T2-L1	56.27	13.54	4.15583	—	13	—	260.13	532.35	180	6.12	—	—	28.32			50.81	53.62
LXID-T2-R2	52.14	14.62	3.56635	—	16	—	272.22	—	—	—	—	—	28.36	43.76	17.56	50.34	45.46
LXID-T2-L2	49.1	—	—	—	—	—	—	—	—	—	—	—		48.13
Mean	53.385	14.6567	3.75538	—	15.3333	—	274.863	542.325	179	|5|	—	—	29.8733	45.945	17.56	51.0167	50.4067

## Sheet: T-unclassified
LXIU
	L	W	L/W	M	M with claw	II-III	III-IV	II-IV
LXIU-TI0	13.94	15.08	0.924403	0.269894	—	57.4	39.23	96.63
LXIU-TI1	6.02	—	—	—	—	—	—	—
LXIU-TI5	8.02	8.28	0.968599	0.153382	—	40.62	22.49	63.11
LXIU-TI8	40.19	30.09	1.33566	0.341642	—	38.22	23.09	61.31
LXIU-TI9	11.5	—	—	—	—	—	—	—
LXIU-TI10	10.2	—	—	—	—	—	—	—

## Sheet: O-Caririchinium (new)
LXID
	L	W	W'	L/W	L/W'	II-IV	II-III	III-IV	PL	SL	PA	R	M	\
LXID-O1-L1	33.95	-	25.38	-	1.33767	-	-	-	85.49	179.76	153.27	-	-
LXID-O1-R1	-	-	32.58	-	-	-	-	-	78.3	-	-	-	-
LXID-O1-L2	36.01	-	24.81	-	1.45143	-	-	-	127.87	201.3	169.619	-11.9	-
LXID-O1-R2	37.47	25.6	29.3	1.46367	1.27884	49	20	29	74.2	-	-	2.07	0.365625
LXID-O1-L3	38.1	27	30.9	1.41111	1.23301	40	19	21	-	177.19	-	9.18	0.211111
LXID-O1-R3	25.41	23.3	29.6	1.09056	0.858446	55	28	27	-	-	-	-	0.386266
LXID-O1-L5	30.3	21.4	25.76	1.41589	1.17624	49	27	22	-	-	-	-6.03	0.350467
LXID-O1-R5	30.5	23.6	28.5	1.29237	1.07018	54	26	28	-	-	-	-	0.300847
Mean	33.1057	24.18	28.3538	1.33472	1.20083	49.4	24	25.4	91.465	186.083	161.445	|7|	0.322863
LXID-O2-R1	15.57	-	19.7	-	0.790355	-	-	-	63.21	122.7	138.613	-	-
LXID-O2-L1	31.03	-	-	-	-	-	18.81	-	67.94	127.39	141.412	-	-
LXID-O2-R2	25.86	16.8	19.46	1.53929	1.32888	41	20	21	67.03	129.63	157.671	25.66	0.235714
LXID-O2-L2	23.86	15.29	20.91	1.5605	1.14108	45	24	21	65.1	127.32	163.446	7.06	0.36102
LXID-O2-R3	22.74	15	19.7	1.516	1.15431	41	26	15	63.56	123.09	162.855	3.09	0.177333
LXID-O2-L3	26.27	20.72	22.18	1.26786	1.1844	59	31	28	60.92	-	-	-13.12	0.401544
LXID-O2-R4	21.37	-	18.01	-	1.18656	-	-	-	-	126.06	-	14.03	-
LXID-O2-R5	26.61	-	18.61	-	1.42988	-	-	-	-	124.2	-	16.77	-
LXID-O2-R6	-	18.83	21.98	-	-	-	-	-	57.44	111.64	166.234	-0.88	-
LXID-O2-L6	27.51	15.52	22.91	1.77255	1.20079	38	21	17	55.01	-	-	-	0.346649
LXID-O2-R7	19.24	20.34	21.39	0.945919	0.899486	68.52	43.35	25.17	-	-	-	6.64	0.192232
LXID-O2-R9	18.27	-	20.2	-	0.904455	-	-	-	-	104.55	-	-	-
LXID-O2-R10	19.13	-	17.35	-	1.10259	-	-	-	52	120.2	-	-0.63	-
LXID-O2-L10	18.14	14.81	20.99	1.22485	0.864221	56	37	19	47.43	107.78	148.468	-	0.203241
LXID-O2-R11	23.61	17.44	20.34	1.35378	1.16077	47	29	18	64.46	-	-	-8.79	0.255161
Mean	22.8007	17.1944	20.2664	1.39759	1.10368	49.44	27.7956	20.5212	60.3727	120.415	154.1	|10|	0.271612
	L	W										L/W
LXID-O2-R9m	6.52	5.13										1.27096
LXID-O2-R10m	7.04	4.8										1.46667
Mean	6.78	4.965										1.36881
LXID-O3-L1	-	-	-	-	-		-	-	57.4	105.1	147.725	-	-
LXID-O3-R1	21.45	16.13	16.52	1.32982	1.29843	64.91	36.07	28.84	52	106.8	143.57	16.41	0.542467
LXID-O3-L2	18.1	14.44	-	1.25346	-	-	-	-	60.4	96.8	141.273	-9.86	-
LXID-O3-R2	21.01	18.57	-	1.13139	-	-	-	-	42	82.9	124.353	3	-
LXID-O3-L3	17.27	14.16	-	1.21963	-	-	-	24.22	51.6	95.1	125.405	-1.2	-
LXID-O3-R3	16.56	-	-	-	-	-	-	-	55.4	108.9	159.883	-	-
LXID-O3-L4	19.39	13.97	15.81	1.38797	1.22644	57.85	39.9	17.95	55.2	105.8	160.04	-13.57	0.443092
LXID-O3-R4	27.66	22.07	-	1.25329	-	-	-	-	50	109.8	152.478	18.85	-
LXID-O3-L5	23.01	17.85	-	1.28908	-	-	-	-	63	-	-	-	-
LXID-O3-R5	22.45	15.8	-	1.42089	-	-	-	-	-	-	-	-	-
Mean	20.7667	16.6238	16.165	1.28569	1.26243	61.38	37.985	23.67	54.1111	101.4	144.341	|11|	0.49278
LXID-O4-R0	17.49	12.19	17.67	1.43478	0.989813	-	20.4	20.82	-	154.42	-	5.56	-
LXID-O4-R1	20.98	12.34	17.86	1.70016	1.17469	39.87	21.67	18.2	-	108.96	-	5.69	0.352512
LXID-O4-R2	20.61	21.23	-	0.970796	-	-	-	-	61.09	-	-	1.98	-
LXID-O4-L2	21.63	15.57	-	1.38921	-	-	-	16.28	-	110.97	-	7.42	-
LXID-O4-L3	27.87	21.45	-	1.2993	-	-	-	-	-	-	-	-	-
LXID-O4-L4	-	24.68	-	-	-	-	-	-	97.04	157.1	158.58	-	-
LXID-O4-R5	26.84	17.76	24.17	1.51126	1.11047	-	-	-	59.2	122.5	154.853	10.31	0.254505
LXID-O4-L5	22.48	15.6	-	1.44103	-	-	-	-	66.3	123.6	138.211	-31.2	-
LXID-O4-R6	21.08	15.18	-	1.38867	-	-	-	-	66	122.7	134.604	14.52	-
LXID-O4-L6	-	-	-	-	-	-	-	-	67	114	144.83	-	-
LXID-O4-R7	16.79	18.27	-	0.918993	-	-	-	-	52.5	104.4	151.133	11.97	-
LXID-O4-L7	23.89	17	-	1.40529	-	-	-	-	55.3	107.8	142.016	-19.25	-
LXID-O4-R8	21.57	15.39	-	1.40156	-	-	-	-	58.7	-	-	-	-
LXID-O4-L8	21.05	16.61	19.58	1.26731	1.07508	53	24	29	-	-	-	-	0.243227
Mean	21.8567	17.1746	19.82	1.34403	1.08751	46.435	22.0233	21.075	64.7922	122.645	146.318	|12|	0.283415
LXIU
	L	W	W'	L/W	L/W'	II-IV	II-III	III-IV	PL	SL	PA	R	M
LXIU-O1-L1	-	19.1	32.97	-	-	-	-	-	87	-	-	-	-
LXIU-O1-RI	27.5	22.2	30.65	1.23874	0.897227	59	30	29	-	-	-	-	0.333333
Mean	27.5	20.65	31.81	1.23874	0.897227	59	30	29	87	-	-	-	0.333333
LXIU-O2-L1	30.6	24.2	32.93	1.26446	0.929244	49	33	16	141	-	-	-	0.172385
LXIU-O2-R1	31.6	27.9	36.84	1.13262	0.857763	69	29	40	-	-	-	-	0.312791
Mean	31.1	26.05	34.885	1.19854	0.893504	59	31	28	141	-	-	-	0.242588
	L	W'										L/W'
LXIU-O2-L1m	14.04	5.96										2.3557
LXIU-O3-L1	10.4	-	11.9	-	0.87395	-	-	-	38.7	71.4	155.195	-	-
LXIU-O3-R1	9.6	-	8.19	-	1.17216	-	-	-	34.4	70.5	143.56	-	-
LXIU-O3-L2	9.9	-	8.21	-	1.20585	-	-	-	39.8	73.2	150.428	-	-
LXIU-O3-R2	10.6	-	9.59	-	1.10532	-	-	-	35.9	69.8	152.236	-	-
LXIU-O3-L3	11.1	-	8.63	-	1.28621	-	-	-	36	74	157.86	-	-
LXIU-O3-R3	9.8	-	7.98	-	1.22807	-	-	-	39.4	74.6	163	-	-
LXIU-O3-L4	8.8	7.8	8.87	1.12821	0.992108	57	22	35	35	64.6	149.832	6	0.207959
LXIU-O3-R4	10	7.4	9.82	1.35135	1.01833	53	24	29	31.9	-	-	-	0.30148
LXIU-O3-L5	9.6		9.14	-	1.05033	-	-	-	-	-	-	-	-
Mean	9.97778	7.6	9.14778	1.23978	1.10359	55	23	32	36.3875	71.1571	153.159	6	0.25472
LXIU-O4-L1	28.4	20.6	30.62	1.37864	0.927498	52	24	28	130.5	228.5	134.516	-9	0.354854
LXIU-O4-R1	23.6	21.6	34.19	1.09259	0.69026	61	23	38	117.2	225.2	143.982	0	0.135791
LXIU-O4-L2	29	23	32.54	1.26087	0.891211	47	32	15	119.6	228.3	144.667	-14	0.0971352
LXIU-O4-R2	25.7	20.7	31.85	1.24155	0.806907	47	26	21	120	-		-	0.0240339
LXIU-O4-R3	29.37	19.63	25.73	1.49618	1.14147	46.03	24.29	21.74	-	-		-	0.0818047
Mean	27.214	21.106	30.986	1.29397	0.891469	50.606	25.858	24.748	121.825	227.333	141.055	|8|	0.138724
	L	W'										L/W'
LXIU-O4-R3m	12.69	8.66										1.46536
LXIU-O5-L1	37.9	25.2	36.45	1.50397	1.03978	48	27	21	98	195	158.753	-13	0.301947
LXIU-O5-R1	24.4	25.1	34.05	0.972112	0.716593	63	36	27	100.4	197.4	161.154	4	0.19292
LXIU-O5-L2	26.4	26.7	36.99	0.988764	0.713706	65	29	36	99.7	193.4	155.784	6	0.173228
LXIU-O5-R2	23.1	25.3	31.76	0.913043	0.72733	71	30	41	98.1	195.3	173.653	-4	0.193676
LXIU-O5-L3	23.9	27.5	32.66	0.869091	0.731782	72	47	25	97.5	186.1	155.043	-4	0.158048
LXIU-O5-R3	26.1	22.2	30.46	1.17568	0.856861	59	37	22	93.1	187.6	156.825	0	0.250451
LXIU-O5-L4	-	-	-	-	-	-	-	-	98.4	-	-	-	-
LXIU-O5-R4	27.1	-	-	-	-	-	-	26	-	-		-	-
LXIU-O5-L5	-	-	-	-	-	-	-	-	-	-	-	-	-
Mean	26.9857	25.3333	33.7283	1.07044	0.797676	63	34.3333	28.2857	97.8857	192.467	160.202	|5|	0.211712
LXIU-O6-L1	11.4	-	11.68	-	0.976027	-	-	-	41.4	76.9	148.99	-	-
LXIU-O6-R1	11.1	-	11.44	-	0.97028	-	-	-	38.4	78.7	143.689	-	-
LXIU-O6-L2	11.7	-	9.24	-	1.26623	-	-	-	44.4	83.7	168.802	-	-
LXIU-O6-R2	9	-	10.17	-	0.884956	-	-	-	39.7	-	-	-	-
LXIU-O6-L3	12.3	8.86	11.04	1.38826	1.11413	52	28	24	-	-	-	-	0.343115
Mean	11.1	8.86	10.714	1.38826	1.04233	52	28	24	40.975	79.7667	153.827	-	0.343115
LUIX-O7-L1	18.2	-	-	-	-	-	-	-	62.2	107.2	153.861	-	-
LXIU-O7-R1	18.4	-	20.3	-	0.906404	-	-	-	47.8	97.7	157.505	-	-
LXIU-O7-L2	16.9	-	16.3	-	1.03681	-	-	-	51.81	104.4	178.414	-	-
LXIU-O7-R2	17.8	15.2	19.5	1.17105	0.912821	-	-	-	52.6	107.2	175.051	-	-
LXIU-O7-L3	19	-	18.7	-	1.01604	-	-	-	54.7	110.8	163.206	-	-
LXIU-O7-R3	18.7	-	18.7	-	1	-	-	-	57.3	117.8	162.407	-	-
LXIU-O7-L4	19.1	-	18.8	-	1.01596	-	-	-	61.9	109.5	166.977	-	-
LXIU-O7-R4	19.8	-	17.4	-	1.13793	-	-	-	48.3	101.8	143.287	-	-
LXIU-O7-L5	17.6	-	16.9	-	1.04142	-	-	-	58.9	109.01	165.369	-	-
LXIU-O7-R5	22.5	16.8	18.9	1.33929	1.19048	-	-	-	51	102.1	180	-	-
LXIU-O7-L6	19.1	-	16.6	-	1.1506	-	-	-	51.1	93.02	155.362	-	-
LXIU-O7-R6	18	12.9	15.2	1.39535	1.18421	52.8	24.9	27.9	44.1	94.96	159.423	9.32	0.39
LXIU-O7-L7	16.3	14.1	15.3	1.15603	1.06536	51.9	22.2	29.7	52.4	100.9	165.611	-2.6	0.22
LXIU-O7-R7	16.1	15.5	15.7	1.03871	1.02548	58.2	23.5	34.7	49.3	102.9	153.458	39.49	0.17
LXIU-O7-L8	18.3	-	19	-	0.963158	-	-	-	56.41	111.7	178.467	-	-
LXIU-O7-R8	22	-	17.6	-	1.25	-	-	-	55.3	106.8	159.862	-	-
LXIU-O7-L9	17.7	-	16	-	1.10625	-	-	-	53.17	99.8	155.454	-8.3	0.21
LXIU-O7-R9	16.7	12.2	-	1.36885	-	-	-	-	48.96	107.5	166.351	-	-
LXIU-O7-L10	-	16.6	17.6	-	-	57.2	-	-	59.3	119.5	163.825	-	-
LXIU-O7-R10	17.2	-	17.5	-	0.982857	-	-	-	61.4	126.3	180	-4.95	-
LXIU-O7-L11	17.4	-	14.3	-	1.21678	-	-	-	64.9	114.8	162.07	-	-
LXIU-O7-R11	21.5	-	14.9	-	1.44295	-	-	-	51.3	86.8	153.933	-	-
LXIU-O7-L12	17.5	-	13.9	-	1.25899	-	-	-	37.74	66.8	102.048	-	-
LXIU-O7-R12	15.3	-	18.9	-	0.809524	-	-	-	47.8	104.4	165.799	-	-
LXIU-O7-L13	-	11.7	14.9	-	-	43.4	-	-	57.4	110	159.402	-	-
LXIU-O7-R13	19.7	15.5	17	1.27097	1.15882	54.4	20.4	34	54.4	108.2	164.48	6.7	0.25
LXIU-O7-L14	18.4	-	14.9	-	1.2349	-	23	-	54.8	101.4	168.611	16	-
LXIU-O7-R14	-	-	-	-	-	-	-	-	47.1	96.6	165.295	-	-
LXIU-O7-L15	15.4	-	15.6	-	0.987179	-	-	34.3	50.3	95.2	164.287	10.7	-
LXIU-O7-R15	19.4	15.5	16	1.25161	1.2125	54.6	23	31.6	45.8	-	-	-	0.22
LXIU-O7-L16	19	-	16.7	-	1.13772	-	-	-	-	101.2	-	-	-
LXIU-O7-L17	19	-	19	-	1	-	-	-	55.4	110.2	168.997	4.25	-
LXIU-O7-R17	19	-	16.8	-	1.13095	-	-	-	55.31	112.7	178.473	16.6	-
LXIU-O7-L18	21.4	-	17.6	-	1.21591	-	-	-	57.4	108.6	169.01	-	-
LXIU-O7-R18	-	-	-	-	-	-	-	-	51.7	87.6	148.273	-	-
LXIU-O7-L19	19.1	17.8	22.7	1.07303	0.84141	64.8	25.3	39.5	39.3	81.7	137.124	12.56	0.22
LXIU-O7-R19	14.6	-	21.2	-	0.688679	-	-	-	48.4	87.95	150.663	20.05	-
LXIU-O7-L20	15.8	-	20.3	-	0.778325	-	-	-	42.5	89.6	154.792	-	-
LXIU-O7-R20	16.8	-	20.6	-	0.815534	-	-	-	49.3	97.3	162.85	-	-
LXIU-O7-L21	17	16.3	19.1	1.04294	0.890052	63.8	28.6	35.2	49.1	98.1	159.441	8	0.2
LXIU-O7-R21	20.4	-	-	-	-	-	-	20	50.6	102.99	158.659	-8.46	-
LXIU-O7-L22	18.3	-	18.7	-	0.97861	-	-	35.1	54.2	-	-	-	-
LXIU-O7-R22	-	16.5	18.5	-	-	48.3	-	-	-	-	-	-	-
Mean	18.2737	15.1231	17.5684	1.21078	1.05099	54.94	23.8625	32.2	52.261	102.326	160.977	|12|	0.235
LXIU-O8-R1	43.4	-	45.8	-	0.947598	-	-	-	105	215.5	164.439	-	-
LXIU-O8-L1	43.9	-	36.18	-	1.21338	-	-	-	112.5	214	166.459	-	-
LXIU-O8-R2	38.5	-	35.96	-	1.07063	-	-	-	103	200.5	158.742	-	-
LXIU-O8-L2	36.2	-		-	-	-	-	-	101	192.2	169.551	-	-
LXIU-O8-R3	36.3	-	36.07	-	1.00638	-	-	-	92	202.5	171.92	-	-
LXIU-O8-L3	36.9	-	29.39	-	1.25553	-	-	-	111	223	159.825	-3	-
LXIU-O8-R4	37.4	-	26.83	-	1.39396	-	-	-	115.5	229	155.13	-	-
LXIU-O8-L4	47.3	-	32.62	-	1.45003	-	-	-	119	223.2	152.049	-	-
LXIU-O8-R5	43.4	-	34.8	-	1.24713	-	-	-	111	221	152.534	-	-
LXIU-O8-L5	49.5	-	33.16	-	1.49276	-	-	-	116.5	252.8	157.288	-	-
LXIU-O8-R6	50.5	-	31.76	-	1.59005	-	-	-	141.3	257.5	161.687	-	-
LXIU-O8-L6	-	-	-	-	-	-	-	-	119.5	220	156.719	-	-
LXIU-O8-R7	51	-	28.31	-	1.80148	-	-	-	105.1	227.5	167.738	-	-
LXIU-O8-L7	43.6	-	32.21	-	1.35362	-	-	-	123.7	218.5	147.018	-	-
LXIU-O8-R8	56.9	-	29.51	-	1.92816	-	-	-	104.1	-	-	-	-
LXIU-O8-L8	53.3	-	33.6	-	1.58631	-	-	-	-	-	-	-	-
Mean	44.54	-	33.3	-	1.38122	-	-	-	112.013	221.229	160.078	|3|	-
	L	W'										L/W'
LXIU-O8-L1m	13	7.88										1.64975
LXIU-O9-R1	11	-	8.62	-	1.2761	-	-	-	61.6	113.2	161.396	-	-
LXIU-O9-L1	9.56	-	9.85	-	0.970558	-	-	-	53.1	95.1	163.362	-	-
LXIU-O9-R2	11.2	-	10.36	-	1.08108	-	-	-	43	-	-	-	-
LXIU-O9-L2	8.2	9.01	11.76	0.9101	0.697279	-	-	-	-	-	-	-	-
Mean	9.99	9.01	10.1475	0.9101	1.00626	-	-	-	52.5667	104.15	162.379	-	-
LXIU-O10-R1	-	33.01	23.12	-	-	-	-	-	75.6	170.98	156.089	-10	-
LXIU-O10-L1	39.7	23.61	29.37	1.68149	1.35172	-	-	-	99.1	185	155.252	6	0.414655
LXIU-O10-R2	37.79	26.3	30.73	1.43688	1.22974	54	37	17	90.29	178.06	152.84	-12	0.261218
LXIU-O10-L2	43.15	21.27	30.3	2.02868	1.42409	38	25	13	92.89	178.02	151.452	0	0.25
LXIU-O10-R3	30.22	-	27.58	-	1.09572	-	-	-	90.8	184.59	156.166	-	-
LXIU-O10-L3	41.29	23.07	30.91	1.78977	1.33581	49	28	21	97.85	184.26	154.319	3	0.23
LXIU-O10-R4	36.48	26.48	39.01	1.37764	0.935145	-	-	-	91.13	186.63	150.749	-5	-
LXIU-O10-L4	23.85	25.11	31.2	0.949821	0.764423	-	-	-	101.73	180.27	160.091	-3	-
LXIU-O10-R5	35.98	31	39.01	1.16065	0.922328	70	40	30	81.26	190	161.886	-10	0.262438
LXIU-O10-L5	30.94	30.04	34.77	1.02996	0.889848	31.1401	0.140112	31	111.08	170.72	138.507	1	0.204027
LXIU-O10-R6	34.23	-	29.84	-	1.14712	-	-	-	70.84	-	-	-	-
LXIU-O10-L6	39.12	21.15	31.48	1.84965	1.24269	25.607	0.606952	25	-	201.16	-	-	0.290909
LXIU-O10-R7	-	-	41.85	-	-	-	-	-	-	-	-	-	-
LXIU-O10-L7	-	-	-	-	-	-	-	-	93.62	178.2	155.067	-	-
LXIU-O10-R8	34.86	30.88	31.61	1.12889	1.10282	-	-	-	88.88	184.82	158.928	10	-
LXIU-O10-L8	37.47	24.65	31.77	1.52008	1.17941	58	30	28	99.1	182.96	157.284	12	0.31
LXIU-O10-R9	-	-	34.38			-	-	-	87.5	195.06	148.111	-25	-
LXIU-O10-L9	29.47	22.65	29.71	1.3011	0.991922	-	-	-	115.21	207.3	162.453	11	-
LXIU-O10-R10	34.09	21.87	31.05	1.55876	1.09791	-	-	-	94.52	-	-	-	-
LXIU-O10-L10	45.16	24.57	31.99	1.83801	1.41169	46	24	22	-	-	-	-	0.3
Mean	35.8625	25.7107	32.0884	1.4751	1.13265	46.4684	23.0934	23.375	93.0235	184.877	154.613	|8|	0.280361
LXIU-O11-R1	25.7	-	-	-	-	-	-	-	106.1	176.3	133.198	11.01	-
LXIU-O11-L1	45.85	-	22	-	2.08409	-	-	-	85.8	160.8	129.725	13.96	-
LXIU-O11-R2	35.8	-	24.4	-	1.46721	-	-	-	91.8	156.1	120.042	21	-
LXIU-O11-L2	43.1	-	-	-	-	-	-	-	88.4	-	-	-	-
LXIU-O11-R3	35.24	-	19.38	-	1.81837	-	-	-	-	152.2	-	17.25	-
LXIU-O11-L3	-	-	-	-	-	-	-	-	-	-	-	-	-
LXIU-O11-R4	34.9	-	25.9	-	1.34749	-	-	-	-	-	-	-	-
LXIU-O11-L4	-	-	-	-	-	-	-	-	-	-	-	-	-
LXIU-O11-R5	-	-	-	-	-	-	-	-	-	-	-	-	-
LXIU-O11-L5	-	-	-	-	-	-	-	-	-	-	-	-	-
LXIU-O11-R6	45.6	-	30.4	-	1.5	-	-	-	97.9	167.1	120.25	6.42	-
LXIU-O11-L6	39.8	-	-	-	-	-	-	-	94.8	163.2	111.125	13.07	-
LXIU-O11-R7	39.9	-	25.3	-	1.57708	-	-	-	103	161.6	131.427	10.03	-
LXIU-O11-L7	45.6	-	-	-	-	-	-	-	73.8	-	-	-	-
LXIU-O11-R8	32.3	-	29.03	-	1.11264	-	-	-	-	163.7	-	3.48	-
LXIU-O11-L8	-	-	-	-	-	-	-	-	-	-	-	-	-
LXIU-O11-R9	32.6	-	24.4	-	1.33607	-	-	-	-	180.1	-	12.84	-
LXIU-O11-L9	-	-	-	-	-	-	-	-	-	-	-	-	-
LXIU-O11-R10	29.03	21.7	24.08	1.33779	1.20556	60.46	35.11	25.35	-	206.4	-	8.92	0.423963
LXIU-O11-L10	-	-	-	-	-	-	-	-	-	-	-	-	-
LXIU-O11-R11	31.22	-	34.7	-	0.899712	-	-	-	-	-	-	-	-
Mean	36.9029	21.7	25.959	1.33779	1.43482	60.46	35.11	25.35	92.7	168.75	124.294	11.798	0.423963
LXIU-O12-L1	34	30	33	1.13333	1.0303	-	-	-	93.5	194.6	152.067	28.9	0.243333
LXIU-O12-R1	39.5	-	33.2	-	1.18976	-	-	-	107	-	-	-	-
LXIU-O12-L2	45	24.15	32.2	1.86335	1.39752	45	25	20	-	-	-	-	0.488613
Mean	39.5	27.075	32.8	1.49834	1.20586	45	25	20	100.25	194.6	152.067	28.9	0.365973
LXIU-O13-L1	8.19	13.14	13.15	0.623288	0.622814	97	60	37	-	55.66	-	-2	0.175799
LXIU-O13-R1	-	-	-	-		-	-	-	-	-	-	-	-
LXIU-O13-L2	12.02	14.21	17.88	0.845883	0.67226	-	-	-	33.32	65.92	129.177	25	-
LXIU-O13-R2	-	-	11.87	-		-	-	-	39.6	-	-	-	-
LXIU-O13-L3	15.58	14.33	14.4	1.08723	1.08194	-	-	-	-	-	-	-	-
LXIU-O13-R3	-	-	-	-		-	-	-	-	-	-	-	-
LXIU-O13-L4	-	-	-	-		-	-	-	-	-	-	-	-
LXIU-O13-R4	-	-	-	-		-	-	-	-	-	-	-	-
LXIU-O13-L5	13.12	14.44	14.65	0.908587	0.895563	-	-	-	-	-	-	-	-
Mean	12.2275	14.03	14.39	0.866247	0.818145	97	60	37	36.46	60.79	129.177	|14|	0.175799
LXIE
	L	W	W'	L/W	L/W'	II-III	III-IV	II-IV	PL	M
LXIE-O1-L1	—	12.18	—	—	—	14.7	—	—	50.68	0.248768
LXIE-O1-R1	21.46	14.71	17.01	1.45887	1.26161	25.19	20.66	45.85	—	0.267165
Mean	21.46	13.445	17.01	1.45887	1.26161	19.945	20.66	45.85	50.68	0.257967
