# Supplementary material for: Dinosaur track assemblages from mid-Cretaceous of Fujian Province, southeastern China: ichnotaxonomic review and faunal comparison
Source: PeerJ. 2025 Jun 24;13:e19597. doi: 10.7717/peerj.19597 (PMC12204092; doi:10.7717/peerj.19597)
Supplement: Supplemental Information 2 — Both track length and width values in this table represent the mean value of the trackway or the sole isolated track from a certain type, which could could better represent the size of a single trackmaker. [file peerj-13-19597-s002.xlsx]

## Sheet: LXIs
Ornithopods
Caririchnium
	L	W'	L/W'		L	W'
LXIN-O29	9	9.1	1.1
LXIN-O42	9.2	7.4	1.2
LXIU-O3	10	9.1	1.1
LXIU-O9	10	10.1	1
LXIN-O23	10.1	10	1
LXIN-O31	10.7	9	1.2
LXIN-O12	10.9	9.4	1.2
LXIU-O6	11.1	10.7	1
LXIN-O22	11.6	10.9	1.1
LXIN-O33	12.2	11.9	1.1	O33-R2m	4.9
LXIU-O13	12.2	14.4	0.8
LXIN-O30	12.8	9.6	1.4
LXIN-O38	12.8	11.7	1.1
LXIN-O47	12.8	12.1	1.1
LXIN-O27	12.9	14.9	0.9	O27-L1m	5.3
LXIN-O34	12.9	10.2	1.2	O34-R3m	2.6
LXIN-O35	14.1	12.7	1.1	O35-L4m	4
LXIN-O26	14.5	14.7	0.9
LXIN-O24	14.6	14.8	1
LXIN-O15	14.9	14.1	1.1
LXIN-O17	15.3	15.7	1
LXIN-O39	15.8	13	1.2
LXIN-O3	16.1	13.9	1.2			9.5
LXIN-O44	16.7	15.8	1.1			10.5
LXIN-O46	17.2	15.6	0.9	O46-L1m	4.5
LXIN-O40	17.5	16	1.1	O40-R2m	10.3
LXIN-O32	18.2	15.7	1.3
LXIU-O7	18.3	17.6	1.1
LXIN-O28	18.6	19.8	1
LXIN-O43	19.2	16.5	1.2
LXIN-O36	19.3	20.2	1
LXIN-O21	19.6	20.7	1			5
LXIN-O19	20	19.5	1	O19-L1m	6
LXIN-O25	20.2	18.2	1.1
LXIN-O4	20.5	18	1.1
LXIN-O10	20.8	17	1.2	O10	5.7
LXID-O3	20.8	16.6	1.3
LXIE-O1	21.5	13.4	17	1.5	1.3
LXID-O4	21.9	18	1.2
LXIN-O18	22	20.7	1.1
LXIN-O11	22.3	18.2	1.3			2.5
LXIN-O37	22.5	18.2	1.2			5.4
LXID-O2	22.8	20.3	1.1	LXID-O2m	6.8	5	—	1.4
LXIN-O2	22.9	22	1			5.9
LXIN-O45	23.7	18.6	1.3
LXIN-O48	23.8	16.6	1.7
LXIN-O6	24.4	17.1	1.4
LXIN-O5	24.6	18.3	1.4
LXIN-O41	25	20.6	1.2	O41	7.3	10.7
LXIN-O20	25.6	21.2	1.3	O20-R1m	8	9.2
LXIU-O4	26	31	0.8	LXIU-O4m	12.7	—	8.7	1.5
LXIN-O9	26.2	19.1	1.4
LXIU-O5	27	33.7	0.8
LXIU-O1	27.5	31.8	0.9
LXIU-O2	31.1	34.9	0.9	LXIU-O2m	14	—	6	2.4
LXIN-O16	31.4	27.1	1.2
LXID-O1	33.1	28.6	1.2
LXIU-O11	36.9	26	1.4
LXIU-O10	39	36.5	1.1
LXIU-O12	39.5	32.8	1.2
LXIN-O13	42.1	29	1.5
LXIU-O8	45.6	34.1	1.4	LXIU-O8m	13		7.9	1.6
LXIN-O14	46.2	41	1.1
LXIN-O1	46.3	35.6	1.3			5.7
LXIN-O7	48.2	36.5	1.3
LXIN-O8	48.8	43.7	1.2
Sauropods
Brontopodus−like
	L	W	L/W
LXIU-S1-P	40.775	33.2167	1.24867
LXIN-S1-P	65.2983	51.2233	1.2902
LXIN-S1-M	36.6286	48.8171	61.132	0.754018	120.513	92.3542		81.5571	—	59.7429	68.8643	0.877209	3214.81	—	—	—
unclassfied
	L	W	W'	L/W	L/W'
LXIII-SI1	34.6	—	29.56	1.1705	—
Theropods
large Eubrontes isp. (A)
	L	W	L/W
LXID-T3*	23.5467	27.1967	0.862287
LXIN-T2*	23.6667	28.2667	0.846525
LXIN-T4*	24.3	28.66	0.853971
LXIN-T3	29.95	22.6	1.27434
LXIN-T1	31.4767	27.0333	1.18717
LXIN-T5	32.4	27.3667	1.21762
LXIN-TI1–6, TI10–16
LXID-TI1
small cf. Eubrontes (A)
	L	W	L/W
LXIU-TI7	12.94	7.17	1.80474
large cf. Eubrontes (B)
	L	W	L/W
LXID-T1	14.005	30.675	0.460266
LXIU-T2	14.7333	29.3467	0.5
[The trackways marked with * contain footprints with an absence of distinct metatarsophalangeal region.]
The statistical data of Fig. 21.
TRI FW sta (minimum)
	FW<10	10=<FW<15	15=<FW<20	20=<FW<25	25=<FW<30	30=<FW<35	35=<FW<40	40=<FW
Ornithopod	6	17	21	7	4	6	3	2
Theropods	1	0	0	1	6	1	0	0
TRI FL sta (minimum)
	FL<10	10=<FL<15	15=<FL<20	20=<FL<25	25=<FL<30	30=<FL<35	35=<FL<40	40=<FL
Ornithopod	2	18	12	16	6	3	3	6

## Sheet: LXIN
Ornithopods
Caririchnium
	L	W'	L/W'		L	W'
LXIN-O29	9	9.1	1.1
LXIN-O42	9.2	7.4	1.2
LXIN-O23	10.1	10	1
LXIN-O31	10.7	9	1.2
LXIN-O12	10.9	9.4	1.2
LXIN-O22	11.6	10.9	1.1
LXIN-O33	12.2	11.9	1.1	O33-R2m	4.9
LXIN-O30	12.8	9.6	1.4
LXIN-O38	12.8	11.7	1.1
LXIN-O47	12.8	12.1	1.1
LXIN-O27	12.9	14.9	0.9	O27-L1m	5.3
LXIN-O34	12.9	10.2	1.2	O34-R3m	2.6
LXIN-O35	14.1	12.7	1.1	O35-L4m	4
LXIN-O26	14.5	14.7	0.9
LXIN-O24	14.6	14.8	1
LXIN-O15	14.9	14.1	1.1
LXIN-O17	15.3	15.7	1
LXIN-O39	15.8	13	1.2
LXIN-O3	16.1	13.9	1.2			9.5
LXIN-O44	16.7	15.8	1.1			10.5
LXIN-O46	17.2	15.6	0.9	O46-L1m	4.5
LXIN-O40	17.5	16	1.1	O40-R2m	10.3
LXIN-O32	18.2	15.7	1.3
LXIN-O28	18.6	19.8	1
LXIN-O43	19.2	16.5	1.2
LXIN-O36	19.3	20.2	1
LXIN-O21	19.6	20.7	1			5
LXIN-O19	20	19.5	1	O19-L1m	6
LXIN-O25	20.2	18.2	1.1
LXIN-O4	20.5	18	1.1
LXIN-O10	20.8	17	1.2	O10	5.7
LXIN-O18	22	20.7	1.1
LXIN-O11	22.3	18.2	1.3			2.5
LXIN-O37	22.5	18.2	1.2			5.4
LXIN-O2	22.9	22	1			5.9
LXIN-O45	23.7	18.6	1.3
LXIN-O48	23.8	16.6	1.7
LXIN-O6	24.4	17.1	1.4
LXIN-O5	24.6	18.3	1.4
LXIN-O41	25	20.6	1.2	O41	7.3	10.7
LXIN-O20	25.6	21.2	1.3	O20-R1m	8	9.2
LXIN-O9	26.2	19.1	1.4
LXIN-O16	31.4	27.1	1.2
LXIN-O13	42.1	29	1.5
LXIN-O14	46.2	41	1.1
LXIN-O1	46.3	35.6	1.3			5.7
LXIN-O7	48.2	36.5	1.3
LXIN-O8	48.8	43.7	1.2
Sauropods
Brontopodus−like
	L	W	L/W
LXIN-S1-P	65.2983	51.2233	1.2902
LXIN-S1-M	36.6286	48.8171	61.132	0.754018	120.513	92.3542		81.5571	—	59.7429	68.8643	0.877209	3214.81	—	—	—
Theropods
large Eubrontes isp. (A)
	L	W	L/W
LXIN-T1	31.4767	27.0333	1.18717
LXIN-T2	23.6667	28.2667	0.846525
LXIN-T3	29.95	22.6	1.27434
LXIN-T4	24.3	28.66	0.853971
LXIN-T5	32.4	27.3667	1.21762
LXIN-TI1–6, TI10–16
TRI FW sta
	FW<10	10=<FW<15	15=<FW<20	20=<FW<25	25=<FW<30	30=<FW<35	35=<FW<40	40=<FW
O	5	13	18	6	2	0	2	2
T	0	0	0	1	4	0	0	0
[The trackways marked with * contain footprints with an absence of distinct metatarsophalangeal region.]

## Sheet: LXID
Ornithopods
Caririchnium
	L	W'	L/W'		L	W	W'	L/W
LXID-O3	20.8	16.6	1.3
LXID-O4	21.9	18	1.2
LXID-O2	22.8	20.3	1.1	LXID-O2m	6.8	5	—	1.4
LXID-O1	33.1	28.6	1.2
Theropods
large cf. Eubrontes (B)
	L	W	L/W
LXID-T1	14.005	30.675	0.460266
large Eubrontes isp. (A)
LXID-T3	23.5467	27.1967	0.862287
LXID-TI1
Possible large didactyl trackway
	L	W	L/W
LXID-T2	53.385	14.6567	3.75538
TRI FW sta
	FW<10	10=<FW<15	15=<FW<20	20=<FW<25	25=<FW<30	30=<FW<35	35=<FW<40	40=<FW
O	0	0	2	1	1	0	0	0
T	0	0	0	0	1	1	0	0

## Sheet: LXIU
Ornithopods
Caririchnium
	L	W'	L/W'		L	W	W'	L/W
LXIU-O3	10	9.1	1.1
LXIU-O9	10	10.1	1
LXIU-O6	11.1	10.7	1
LXIU-O13	12.2	14.4	0.8
LXIU-O7	18.3	17.6	1.1
LXIU-O4	26	31	0.8	LXIU-O4m	12.7	—	8.7	1.5
LXIU-O5	27	33.7	0.8
LXIU-O1	27.5	31.8	0.9
LXIU-O2	31.1	34.9	0.9	LXIU-O2m	14	—	6	2.4
LXIU-O11	36.9	26	1.4
LXIU-O10	39	36.5	1.1
LXIU-O12	39.5	32.8	1.2
LXIU-O8	45.6	34.1	1.4	LXIU-O8m	13		7.9	1.6
Sauropods
Brontopodus−like
	L	W	L/W
LXIU-S1-P	40.775	33.2167	1.24867
LXIU-S1-M	16.6167	25.9142	∣27∣	0.700969	99.8111	162.581	110.795	358.876	—	56.5866
Theropods
large cf. Eubrontes (B)
	L	W	L/W
LXIU-T2	14.7333	29.3467	0.5
small cf. Eubrontes (A)
	L	W	L/W
LXIU-TI7	12.94	7.17	1.80474
Velociraptorichnus
	L	L/W
LXIU-T1	11.1	1.8
LXIU-TI10
Fujianipus
	L	L/W
LXIU-T3	36.8	1.8
unclassfied
LXIU-TIs
TRI FW sta
	FW<10	10=<FW<15	15=<FW<20	20=<FW<25	25=<FW<30	30=<FW<35	35=<FW<40	40=<FW
O	1	3	1	0	1	6	1	0
T	0	0	0	0	1	0	0	0

## Sheet: LXIE
Ornithopods
Caririchnium
	L	W	W'	L/W	L/W'
LXIE-O1	21.5	13.4	17	1.5	1.3

## Sheet: LXII
Dinosaur indet.
LXII-TIs

## Sheet: LXIII
Ornithopods
unclassfied
	L	W	W'	L/W	L/W'
LXIII-OI1	>15.5	15.51	21.79	—	—
Sauropods
unclassfied
	L	W	W'	L/W	L/W'
LXIII-SI1	34.6	—	29.56	1.1705	—
Theropods
large Eubrontes isp. (A)
LXIII-TI1
small Eubrontes isp. (A)
LXIII-TI2-4
